# Supplementary material for: Impact of the Alberta Stroke Program CT Score subregions on long-term functional outcomes in acute ischemic stroke: Results from two multicenter studies in China
Source: PubMed Central journal article supplement (PMC11107184; doi:10.2478/jtim-2022-0057), 2022-11-15
Supplement: jtim-2022-0057_sm.pdf [file jtim-2022-0057_sm.pdf]

**Table S1: Pearson’s correlation between subregions captured by the ASPECTS in the reperfusion therapy cohort**

| ASPECTS subregions | C | L       | IC      | I      | M1      | M2      | M3      | M4      | M5      | M6      |
|--------------------|---|---------|---------|--------|---------|---------|---------|---------|---------|---------|
| C                  | 1 | 0.452** | 0.334** | 0.152  | 0.163   | 0.85    | -0.041  | 0.164   | -0.118  | 0.021   |
| L                  |   | 1       | 0.375** | -0.102 | -0.019  | -0.114  | -0.204* | 0.097   | -0.063  | -0.205* |
| IC                 |   |         | 1       | 0.132  | 0.069   | -0.030  | -0.031  | 0.040   | -0.098  | 0.017   |
| I                  |   |         |         | 1      | 0.298** | 0.590** | 0.173   | 0.239** | 0.151   | 0.309** |
| M1                 |   |         |         |        | 1       | 0.432** | 0.191*  | 0.459** | 0.099   | 0.196*  |
| M2                 |   |         |         |        |         | 1       | 0.270** | 0.204*  | 0.293** | 0.368** |
| M3                 |   |         |         |        |         |         | 1       | 0.252** | 0.165   | 0.503** |
| M4                 |   |         |         |        |         |         |         | 1       | 0.322** | 0.171   |
| M5                 |   |         |         |        |         |         |         |         | 1       | 0.221*  |
| M6                 |   |         |         |        |         |         |         |         |         | 1       |

\*indicates correlation is significant at the 0.05 level. \*\* indicates correlation is significant at the 0.01 level. ASPECTS: Alberta Stroke Program Early CT Score; C: caudate nucleus; L: lenticular nucleus; IC: internal capsule; I: insula.

**Table S2: Pearson’s correlation between subregions captured by the ASPECTS in the medical therapy cohort**

| ASPECTS subregions | C | L       | IC      | I     | M1      | M2      | M3      | M4      | M5      | M6      |
|--------------------|---|---------|---------|-------|---------|---------|---------|---------|---------|---------|
| C                  | 1 | 0.488** | 0.335** | 0.091 | 0.149*  | 0.083   | 0.007   | 0.105   | 0.019   | 0.012   |
| L                  |   | 1       | 0.398** | 0.015 | 0.182** | -0.015  | -0.155* | 0.056   | -0.058  | -0.165* |
| IC                 |   |         | 1       | 0.072 | 0.074   | 0.026   | 0.010   | 0.050   | -0.133* | -0.006  |
| I                  |   |         |         | 1     | 0.339** | 0.659** | 0.098   | 0.198** | 0.323** | 0.189** |
| M1                 |   |         |         |       | 1       | 0.353** | 0.095   | 0.627** | 0.311** | 0.100   |
| M2                 |   |         |         |       |         | 1       | 0.235** | 0.179** | 0.387** | 0.259** |
| M3                 |   |         |         |       |         |         | 1       | 0.095   | 0.141*  | 0.524** |
| M4                 |   |         |         |       |         |         |         | 1       | 0.301** | 0.101   |
| M5                 |   |         |         |       |         |         |         |         | 1       | 0.154*  |
| M6                 |   |         |         |       |         |         |         |         |         | 1       |

\*indicates correlation is significant at the 0.05 level. \*\* indicates correlation is significant at the 0.01 level. ASPECTS: Alberta Stroke Program Early CT Score; C: caudate nucleus; L: lenticular nucleus; IC: internal capsule; I: insula.

**Table S3: The tolerance and variance inflation factor for the reperfusion and medical therapy cohorts**

| ASPECTS subregions | Reperfusion cohort |       | Medical therapy cohort |       |
|--------------------|--------------------|-------|------------------------|-------|
|                    | Tolerance          | VIF   | Tolerance              | VIF   |
| C                  | 0.698              | 1.432 | 0.723                  | 1.383 |
| L                  | 0.649              | 1.541 | 0.640                  | 1.563 |
| IC                 | 0.781              | 1.280 | 0.785                  | 1.273 |
| I                  | 0.586              | 1.701 | 0.540                  | 1.853 |
| M1                 | 0.642              | 1.559 | 0.515                  | 1.942 |
| M2                 | 0.497              | 2.013 | 0.493                  | 2.030 |
| M3                 | 0.694              | 1.441 | 0.697                  | 1.435 |
| M4                 | 0.639              | 1.564 | 0.580                  | 1.723 |
| M5                 | 0.773              | 1.293 | 0.760                  | 1.317 |
| M6                 | 0.656              | 1.523 | 0.691                  | 1.446 |

VIF: variance inflation factor; ASPECTS: Alberta Stroke Program Early CT Score; C: caudate nucleus; L: lenticular nucleus; IC: internal capsule; I: insula.
